# Supplementary material for: Neutralization effect of plasma from vaccinated COVID-19 convalescents on SARS-CoV-2 Omicron variants
Source: Front Immunol. 2022 Sep 29;13:975533. doi: 10.3389/fimmu.2022.975533 (PMC9556728; doi:10.3389/fimmu.2022.975533)
Supplement: Supplementary file 1 [file Table_1.xlsx]

## Sheet: sheet1
Sample No.	Group	RBD IgG antibody titer	RBD IgG antibody 1:200 diluted S/CO value
A3	pre-vaccination	640	2.66434
A4	pre-vaccination	640	2.32168
A17	pre-vaccination	640	1.86713
A21	pre-vaccination	1280	7.58741
A26	pre-vaccination	320	2.28671
A32	pre-vaccination	640	2.93007
A34	pre-vaccination	640	1.37762
A36	pre-vaccination	1280	7.96503
A39	pre-vaccination	640	3.88112
A43	pre-vaccination	640	2.28671
A51	pre-vaccination	640	2.60839
A61	pre-vaccination	640	2.95804
A67	pre-vaccination	640	2.64336
14888	pre-vaccination	＞1280	7.66434
14900	pre-vaccination	640	2.53846
14930	pre-vaccination	1280	3.55944
14991	pre-vaccination	640	3.02797
15415	pre-vaccination	1280	3.73427
40597	pre-vaccination	＞1280	8.55944
40598	pre-vaccination	640	2.6993
40616	pre-vaccination	640	2.59441
40781	pre-vaccination	＞1280	8.73427
40783	pre-vaccination	640	2.51748
40785	pre-vaccination	1280	5.95105
44945	pre-vaccination	1280	5.46853
A22	one-dose vaccinated	＞1280	22.6713
A30	one-dose vaccinated	640	2.07692
A33	one-dose vaccinated	640	2.48252
A40	one-dose vaccinated	640	4.27972
A44	one-dose vaccinated	320	1.87413
A47	one-dose vaccinated	640	1.65035
A50	one-dose vaccinated	1280	4.1049
A57	one-dose vaccinated	640	3.55245
A63	one-dose vaccinated	640	2.26573
B9	one-dose vaccinated	640	2.41259
B26	one-dose vaccinated	1280	6.76923
B29	one-dose vaccinated	1280	4.60839
B43	one-dose vaccinated	1280	6.2028
C3	one-dose vaccinated	1280	4.51049
A72	one-dose vaccinated	1280	6.94406
A74	one-dose vaccinated	1280	7.72028
B66	one-dose vaccinated	1280	14.014
A24	two-dose vaccinated	1280	7.74126
A58	two-dose vaccinated	1280	3.3007
A75	two-dose vaccinated	1280	6.99301
B2	two-dose vaccinated	1280	3.11189
B5	two-dose vaccinated	1280	4.28671
B6	two-dose vaccinated	640	2.53846
B12	two-dose vaccinated	1280	3.41259
B14	two-dose vaccinated	1280	6.75524
B20	two-dose vaccinated	640	3.24476
B23	two-dose vaccinated	1280	4.58042
B30	two-dose vaccinated	640	1.90909
B33	two-dose vaccinated	1280	4.56643
B34	two-dose vaccinated	1280	8.32168
B41	two-dose vaccinated	640	2.70629
B52	two-dose vaccinated	1280	7.22378
B54	two-dose vaccinated	640	1.77622
B55	two-dose vaccinated	1280	4.85315
B59	two-dose vaccinated	1280	5.13986
C22	two-dose vaccinated	＞1280	19.4196
B46	two-dose vaccinated	1280	5.8951
B51	two-dose vaccinated	1280	9.61538
B56	two-dose vaccinated	640	2.14685
