# Supplementary material for: Neutralization effect of plasma from vaccinated COVID-19 convalescents on SARS-CoV-2 Omicron variants
Source: Front Immunol. 2022 Sep 29;13:975533. doi: 10.3389/fimmu.2022.975533 (PMC9556728; doi:10.3389/fimmu.2022.975533)
Supplement: Supplementary file 2 [file Table_2.xlsx]

## Sheet: sheet1
Sample No.	Group	WT Neutralizing titer	Delta Neutralizing titer	Omicron Neutralizing titer
A3	pre-vaccination	5851	94	<30
A4	pre-vaccination	>7290	60	<30
A17	pre-vaccination	4952	<30	<30
A21	pre-vaccination	>7290	3275	191
A26	pre-vaccination	5394	45	<30
A32	pre-vaccination	>7290	163	<30
A34	pre-vaccination	6120	163	31
A36	pre-vaccination	>7290	3255	74
A39	pre-vaccination	>7290	55	<30
A43	pre-vaccination	1525	73	<30
A51	pre-vaccination	>7290	99	55
A61	pre-vaccination	1281	3090	44
A67	pre-vaccination	>7290	197	<30
14888	pre-vaccination	3749.7	117	<30
14900	pre-vaccination	>7290	670	<30
14930	pre-vaccination	698.515	4988	<30
14991	pre-vaccination	867	47	<30
15415	pre-vaccination	>7290	329	34
40597	pre-vaccination	>7290	289	<30
40598	pre-vaccination	825	206	<30
40616	pre-vaccination	>7290	<30	<30
40781	pre-vaccination	1525	79	<30
40783	pre-vaccination	401	37	<30
40785	pre-vaccination	>7290	93	<30
44945	pre-vaccination	126.142	89	<30
A22	one-dose vaccinated	>7290	632	435
A30	one-dose vaccinated	654	38	<30
A33	one-dose vaccinated	359.075	49	44
A40	one-dose vaccinated	2965.91	457	92
A44	one-dose vaccinated	4346.29	938	32
A47	one-dose vaccinated	1043.21	276	<30
A50	one-dose vaccinated	1420.96	187	218
A57	one-dose vaccinated	262.502	59	<30
A63	one-dose vaccinated	86.0399	57	<30
B9	one-dose vaccinated	1684	81	<30
B26	one-dose vaccinated	1019	289	54
B29	one-dose vaccinated	391	205	42.6626
B43	one-dose vaccinated	6752	419	138.75
C3	one-dose vaccinated	4945	746	83.7248
A72	one-dose vaccinated	>7290	114	83.5367
A74	one-dose vaccinated	6507	118	<30
B66	one-dose vaccinated	>7290	388	198
A24	two-dose vaccinated	6103	526	72
A58	two-dose vaccinated	377	251	94
A75	two-dose vaccinated	1801	55	49
B2	two-dose vaccinated	898	49	39
B5	two-dose vaccinated	>7290	50	120
B6	two-dose vaccinated	147	208	<30
B12	two-dose vaccinated	>7290	46	185
B14	two-dose vaccinated	2070.83	46	496
B20	two-dose vaccinated	186	76	157
B23	two-dose vaccinated	163.273	260	34
B30	two-dose vaccinated	2193	35	<30
B33	two-dose vaccinated	>7290	145	55
B34	two-dose vaccinated	>7290	394	481
B41	two-dose vaccinated	410	152	<30
B52	two-dose vaccinated	>7290	393	69
B54	two-dose vaccinated	759	149	<30
B55	two-dose vaccinated	>7290	368	198
B59	two-dose vaccinated	3352	544	192
C22	two-dose vaccinated	4548.76	763	267.494
B46	two-dose vaccinated	>7290	1452	67
B51	two-dose vaccinated	715.83	216	283.011
B56	two-dose vaccinated	466	4269	<30
